# Supplementary material for: A combined MR and CT study for precise quantitative analysis of the avian brain
Source: Springer Nature journal article supplement (doi:10.1038/srep16002), 2015-10-30
Supplement: 41598_2015_BFsrep16002_MOESM1_ESM.pdf [file 41598_2015_BFsrep16002_MOESM1_ESM.pdf]

Supplement for:

## A combined MR and CT study for precise quantitative analysis of the avian brain.

Daniel Jirak<sup>1,2</sup>, Jiri Janacek<sup>3</sup> & Benjamin P. Kear<sup>4,5</sup>

<sup>1</sup>MR Unit, Department of Diagnostic and Interventional Radiology, Institute for Clinical and Experimental Medicine, Vídeňská 1958/9 140 21 Prague, Czech Republic, <sup>2</sup>Institute of Biophysics and Informatics, 1st Medicine Faculty, Charles University, Prague, Czech Republic, <sup>3</sup>Department of Biomathematics, Institute of Physiology, The Czech Academy of Sciences, Vídeňská 1083 142 20 Prague, Czech Republic, <sup>4</sup>Museum of Evolution, Uppsala University, Norbyvägen 16, SE-752 36 Uppsala, Sweden. <sup>5</sup>Palaeobiology Programme, Department of Earth Sciences, Uppsala University, Villavägen 16, SE-752 36 Uppsala, Sweden.

**Correspondence and requests for material should be sent to:** Daniel Jirak email: daji@medicon.cz

### Additional information for Results and Discussion

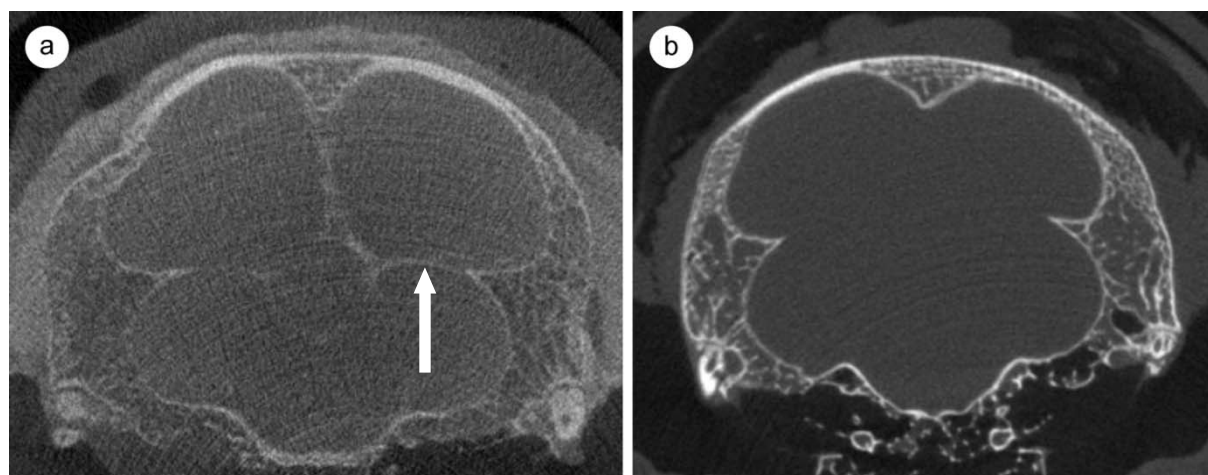

**Supplementary Figure 1 | Comparative effects of SPT treatment for improved CT contrast of intracranial structures in adult *Phasianus colchicus*.** (a) Visualization of a male specimen with SPT showing enhanced contrast between major brain tissue regions; (b) female specimen with no internal structures detected when SPT was withheld. Arrow indicates internal structures visible only after SPT treatment.

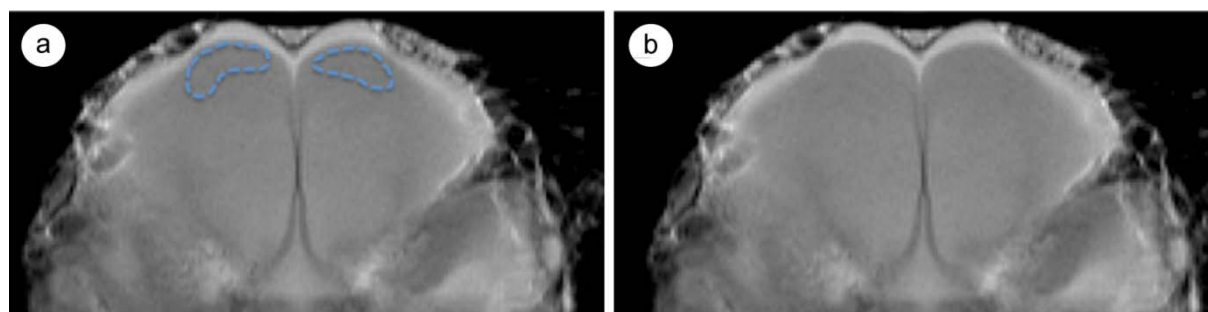

**Supplementary Figure 2 | MR imaging (2D RARE) of a control sample (*Opisthocomus hoazin*) to test the effects of prolonged scan time.** (a) Visualization immediately following removal from medium; (b) visualization after 13 hours prolonged scanning. Highlighted area (dashed line) was targeted for comparative T<sub>2</sub> calculations.

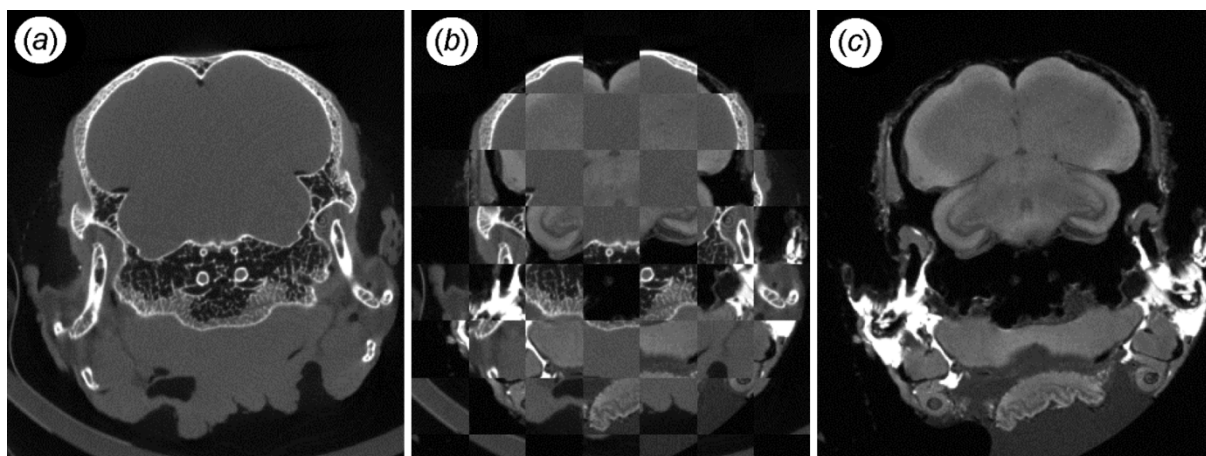

**Supplementary Figure 3 | Co-registration of CT and 3D RARE MR images of the cranium from an adult (male) *Phasianus colchicus*.** (a) CT image; (b) checkerboard mosaic image (from CT and MR) registered by mutual information minimization in 3D; (c) MR image.

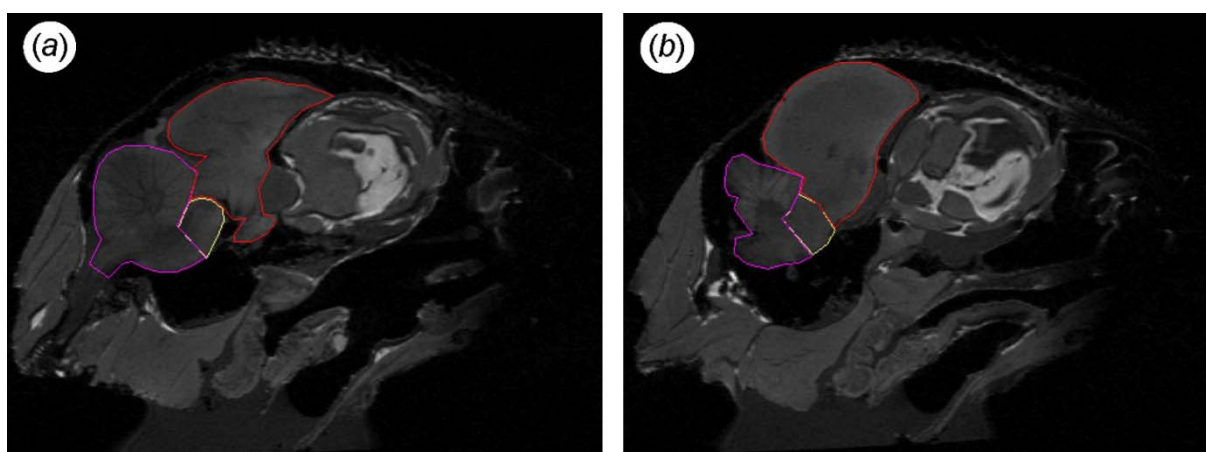

**Supplementary Figure 4 | Delineation of brain compartments in 3D RARE MR images of the cranium from an adult (male) *Phasianus colchicus*.** (a) Saggital middle plain; (b) saggital plane 2.7 mm from the middle plain. Colour demarcation: red = prosencephalon; yellow = mesencephalon; purple = cerebellum and hindbrain (rhombencephalon). Compartmental areas were delineated manually based on Karten *et al.*<sup>1</sup>

## References

Karten, H. J., Brzozowska-Prechtl, A., Lovell, P. V., Tang, D. D., Mello, C. V., Wang, H., & Mitra, P. P. Digital atlas of the zebra finch (*Taeniopygia guttata*) brain: A high-resolution photo atlas. *J. Comp. Neurol.* **521**, 3702–3715 (2013).

## Additional information for Methods

**Supplementary Table 1 | Parameters for relaxometry measurements of  $T_1/T_2$  versus SPT.** Abbreviations:

• $T_1$ , utilizes saturation recovery sequence; •• $T_2$ , utilizes CPMG sequence.

| Parameters            | • $T_1$ | •• $T_2$ |
|-----------------------|---------|----------|
| Recycle delay (s)     | 10      | 5        |
| Number of points      | 10      | 2000     |
| Duration factor       | 1.85    | -        |
| Pulse separation (ms) | -       | 1        |
| Echo number           | -       | 2000     |

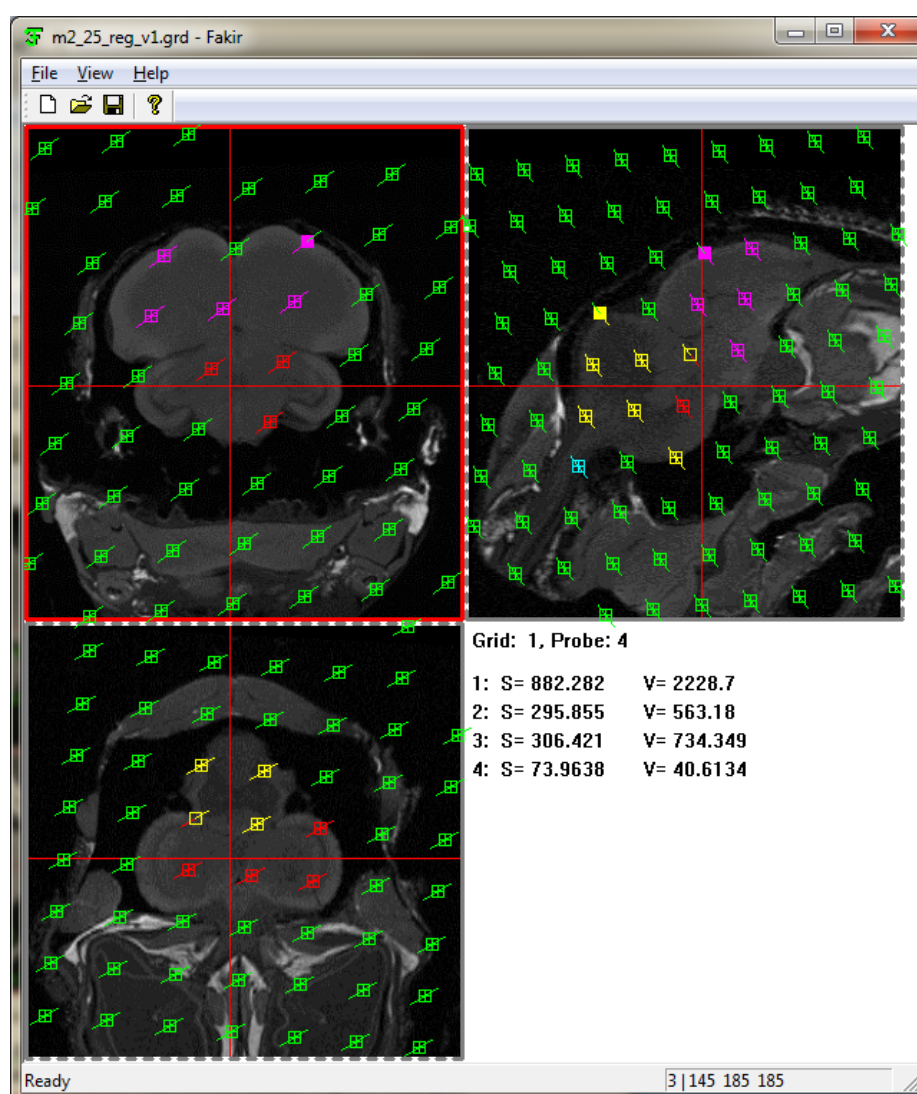

**Supplementary Figure 5 | Screen capture of the Fakir probe compartmental brain volume measurements from an adult (male) *Phasianus colchicus*.** Orthoslice includes one of seven parallel line sets. Colour demarcation: green = non-brain tissues or space; purple = prosencephalon; red = mesencephalon; yellow = cerebellum and hindbrain (rhombencephalon); cyan = spinal cord. Filled squares delimit the brain surface.
